# Supplementary material for: Ethanol represses the expression of methanol-inducible genes via acetyl-CoA synthesis in the yeast Komagataella phaffii
Source: PubMed Central journal article supplement (PMC6303403; doi:10.1038/s41598-018-36732-2), 2018-12-21

## Supplementary Information

### **Ethanol represses the expression of methanol-inducible genes via acetyl-CoA synthesis in the yeast *Komagataella phaffii***

Shin Ohsawa<sup>1</sup>, Susumu Nishida<sup>1</sup>, Masahide Oku<sup>1</sup>, Yasuyoshi Sakai<sup>1,2</sup>, and Hiroya Yurimoto<sup>1,\*</sup>

<sup>1</sup>*Division of Applied Life Sciences, Graduate School of Agriculture, Kyoto University, Kitashirakawa-Oiwake, Sakyo-ku, Kyoto 606-8502, Japan*

<sup>2</sup>*Research Unit for Physiological Chemistry, the Center for the Promotion of Interdisciplinary Education and Research, Kyoto University, Japan*

\*Correspondence: Hiroya Yurimoto, Division of Applied Life Sciences, Graduate School of Agriculture, Kyoto University, Kitashirakawa-Oiwake, Sakyo-ku, Kyoto 606-8502, Japan.

Tel.: +81 75 753 6387; fax: +81 75 753 6454; e-mail: yury@kais.kyoto-u.ac.jp

**Table S1. Yeast strains used in this study**

| Strain  | Genotype                                                            | Reference  |
|---------|---------------------------------------------------------------------|------------|
| STW1    | <i>arg4 his4::P<sub>AOXI</sub>GFP-PTS1</i>                          | 1          |
| SN1100  | STW1, <i>arg4::ARG4</i>                                             | This study |
| SN1001  | STW1, <i>Kpadh2Δ::Zeo<sup>r</sup></i>                               | This study |
| SN1101  | SN1001, <i>arg4::ARG4</i>                                           | This study |
| SN1002  | STW1, <i>Kpald4Δ::Zeo<sup>r</sup></i>                               | This study |
| SN1102  | SN1002, <i>arg4::ARG4</i>                                           | This study |
| PPY12   | <i>arg4 his4</i>                                                    | 2          |
| SN2100  | PPY12, <i>arg4::ARG4</i>                                            | This study |
| SN2101  | SN2100, <i>his4::HIS4</i>                                           | This study |
| SN2004  | PPY12, <i>Kpadh2Δ::Zeo<sup>r</sup></i>                              | This study |
| SN2005  | SN2004, <i>his4::HIS4</i>                                           | This study |
| SN2006  | SN2005, <i>arg4::ARG4</i>                                           | This study |
| SN2003  | PPY12, <i>Kpmxr1Δ::Bsd<sup>r</sup></i>                              | This study |
| SN2803  | SN2003, <i>arg4::P<sub>KpMXR1</sub>-MXR1<sup>S215A</sup>-5xFLAG</i> | This study |
| SN2804  | SN2803, <i>his4::HIS4</i>                                           | This study |
| SN2805  | SN2804, <i>Kpadh2Δ::Zeo<sup>r</sup></i>                             | This study |
| SN1003  | STW1, <i>Kpacs1Δ::Zeo<sup>r</sup></i>                               | This study |
| SN1103  | SN1003, <i>arg4::ARG4</i>                                           | This study |
| SN1104  | SN1100, <i>Kpacs2Δ::Bsd<sup>r</sup></i>                             | This study |
| SN2001  | PPY12, <i>Kpacs1Δ::Zeo<sup>r</sup></i>                              | This study |
| SN2500  | SN2001, <i>his4::HIS4</i>                                           | This study |
| SN2501  | SN2001, <i>his4::P<sub>KpACSI</sub>-KpACSI-CFP</i>                  | This study |
| SN2503  | SN2001, <i>his4::P<sub>KpACSI</sub>-KpACSI2-CFP</i>                 | This study |
| SN2505  | SN2001, <i>his4::P<sub>KpACSI</sub>-ScACSI-CFP</i>                  | This study |
| SN2502  | SN2501, <i>arg4::ARG4</i>                                           | This study |
| SN2504  | SN2503, <i>arg4::ARG4</i>                                           | This study |
| SN2506  | SN2505, <i>arg4::ARG4</i>                                           | This study |
| SN2507  | SN2500, <i>arg4::ARG4</i>                                           | This study |
| SN2508  | SN2001, <i>his4::P<sub>KpACSI</sub>-KpACSI(Δ3-6)-CFP</i>            | This study |
| SN2509  | SN2508, <i>arg4::ARG4</i>                                           | This study |
| OH3001  | PPY12, <i>Kpatg1Δ::Zeo<sup>r</sup></i>                              | This study |
| OH3002  | OH3001, <i>his4::P<sub>KpACSI</sub>-KpACSI-CFP</i>                  | This study |
| OH3003  | OH3002, <i>arg4::ARG4</i>                                           | This study |
| OH3004  | PPY12, <i>Kpatg11Δ::Zeo<sup>r</sup></i>                             | This study |
| OH3005  | OH3004, <i>his4::P<sub>KpACSI</sub>-KpACSI-CFP</i>                  | This study |
| OH3006  | OH3005, <i>arg4::ARG4</i>                                           | This study |
| OH3007  | PPY12, <i>Kpatg17Δ::Zeo<sup>r</sup></i>                             | This study |
| OH3008  | OH3007, <i>his4::P<sub>KpACSI</sub>-PpACSI-CFP</i>                  | This study |
| OH3009  | OH3008, <i>arg4::ARG4</i>                                           | This study |
| SMD1163 | <i>his4 Kppep4 Kpprb1</i>                                           | 3          |
| OH3010  | SMD1163, <i>his4::P<sub>KpACSI</sub>-KpACSI-CFP</i>                 | This study |
| OH3011  | PPY12, <i>his4::HIS4</i>                                            | This study |
| OH3012  | OH3011, <i>arg4::P<sub>PpPex11</sub>-PpPEX11-YFP</i>                | 4          |
| OH3013  | OH3012, <i>Ppadh2Δ::Zeo<sup>r</sup></i>                             | This study |
| OH3014  | OH3012, <i>Ppald4Δ::Zeo<sup>r</sup></i>                             | This study |
| OH3015  | OH3012, <i>Ppacs1Δ::Zeo<sup>r</sup></i>                             | This study |
| GS115   | <i>his4</i>                                                         | 5          |
| SN2901  | GS115, <i>his4::P<sub>KpAOXI</sub>-CFP-SKL</i>                      | This study |
| SN2902  | SN2901, <i>Kpatg1Δ::Bsd<sup>r</sup></i>                             | This study |
| SN2903  | SN2901, <i>P<sub>KpGPD1</sub>-KpACSI-Myc-6xHis::Zeo<sup>r</sup></i> | This study |

## References

- 1 Wiemer, E. A. C., Lüers, G., Faber, K. N., Wenzel, T., Veenhuis, M., Subramani, S. Isolation and characterization of Pas2p, a peroxisomal membrane protein essential for peroxisome biogenesis in the methylotrophic yeast *Pichia pastoris*. *J Biol Chem* **271**, 18973–18980 (1996).
- 2 Gould, S. J., McCollum, D., Spong, A. P., Heyman, J. A., & Subramani, S. Development of the yeast *Pichia pastoris* as a model organism for a genetic and molecular analysis of peroxisome assembly. *Yeast* **8**, 613–628 (1992).
- 3 Tuttle, D. L. & Dunn Jr., W. A. Divergent modes of autophagy in the methylotrophic yeast *Pichia pastoris*. *J*

*Cell Sci* **108**, 25-35 (1995).

- 4 Yamashita, S., Oku, M., Sakai, Y. & Fujiki, Y. Experimental systems to study yeast pexophagy. *Methods Mol Biol* **1595**, 249-255 (2017).
- 5 Cregg, J. M., Barringer, K. J., Hessler, A. Y. & Blondin, B. *Pichia pastoris* as a host system for transformations. *Mol Cell Biol* **5**, 3376-3385 (1985).

**Table S2. Plasmids used in this study**

| Designation         | Description                                                       | Reference                |
|---------------------|-------------------------------------------------------------------|--------------------------|
| SK+Zeo <sup>r</sup> | <i>Zeo<sup>r</sup></i>                                            | 1                        |
| pPIC6A              | <i>Bsd<sup>r</sup></i>                                            | Thermo Fisher Scientific |
| pGAPZ A             | <i>Zeo<sup>r</sup></i> , <i>P<sub>GAP1</sub>-Myc-6xHis</i>        | Thermo Fisher Scientific |
| pIB1                | <i>HIS4</i>                                                       | 2                        |
| pNT204              | pIB1 <i>ARG4</i>                                                  | 3                        |
| pNT206              | pIB1 <i>5xFLAG ARG4</i>                                           | 4                        |
| pSY004              | pIB1 <i>CFP HIS4</i>                                              | 5                        |
| pREMI-Z             | <i>Zeo<sup>r</sup></i>                                            | 6                        |
| pSN100              | <i>ΔKpadh2::Zeo<sup>r</sup></i>                                   | This study               |
| pSN200              | <i>ΔKpald4::Zeo<sup>r</sup></i>                                   | This study               |
| pSN201              | <i>ΔKpacs1::Zeo<sup>r</sup></i>                                   | This study               |
| pSN101              | <i>ΔKpacs2::Bst<sup>r</sup></i>                                   | This study               |
| pSN102              | <i>ΔKpmxr1::Bst<sup>r</sup></i>                                   | This study               |
| pSN103              | <i>ΔKpatg1::Bsd<sup>r</sup></i>                                   | This study               |
| pSY8601             | <i>ΔKPpatg1::Zeo<sup>r</sup></i>                                  | 5                        |
| pSY8611             | <i>ΔKpatg11::Zeo<sup>r</sup></i>                                  | 5                        |
| pSY8617             | <i>ΔKpatg17::Zeo<sup>r</sup></i>                                  | 5                        |
| pYA006              | <i>P<sub>AOX1</sub>CFP-SKL HIS4</i>                               | 7                        |
| pSN400              | <i>P<sub>KpACS1</sub>KpACS1-CFP HIS4</i>                          | This study               |
| pSN401              | <i>P<sub>KpACS1</sub>KpACS2-CFP HIS4</i>                          | This study               |
| pSN402              | <i>P<sub>KpACS1</sub>ScACS2-CFP HIS4</i>                          | This study               |
| pSN403              | <i>P<sub>KpACS1</sub>KpACS1(Δ3-6)-CFP HIS4</i>                    | This study               |
| pSN303              | <i>P<sub>KpMXR1</sub>KpMXR1-5xFLAG ARG4</i>                       | This study               |
| pSN304              | <i>P<sub>KpMXR1</sub>KpMXR1<sup>S215A</sup>-5xFLAG ARG4</i>       | This study               |
| pSN500              | <i>Zeo<sup>r</sup></i> , <i>P<sub>GAP1</sub>-KpACS1-Myc-6xHis</i> | This study               |

## References

- 1 Yano, T., Takigami, E., Yurimoto, H. & Sakai, Y. Yap1-regulated glutathione redox system curtails accumulation of formaldehyde and reactive oxygen species in methanol metabolism of *Pichia pastoris*. *Eukaryot Cell* **8**, 540-549 (2009).
- 2 Sears, I. B., O'Connor, J., Rossanese, O. W. & Glick, B.S. A versatile set of vectors for constitutive and regulated gene expression in *Pichia pastoris*. *Yeast* **14**, 783-790 (1998).
- 3 Tamura, N., Oku, M. & Sakai, Y. Atg8 regulates vacuolar membrane dynamics in a lipidation-independent manner in *Pichia pastoris*. *J Cell Sci* **123**, 4107-4116 (2010).
- 4 Tamura, N., *et al.* Atg18 phosphoregulation controls organellar dynamics by modulating its phosphoinositide-binding activity. *J Cell Biol* **202**, 685-698 (2013).
- 5 Yamashita, S. *et al.* Lag-phase autophagy in the methylotrophic yeast *Pichia pastoris*. *Genes Cells* **14**, 861-870 (2009).
- 6 Mukaiyama, H. *et al.* Paz2 and 13 other PAZ gene products regulate vacuolar engulfment of peroxisomes during micropexophagy. *Genes Cells* **7**, 75-90 (2002).
- 7 Ano, Y. *et al.* A sorting nexin PpAtg24 regulates vacuolar membrane dynamics during pexophagy via binding to phosphatidylinositol-3-phosphate. *Mol Biol Cell* **16**, 446-457 (2005).

**Table S3. Primers used in this study**

| Designation                     | DNA Sequence                                            |
|---------------------------------|---------------------------------------------------------|
| PpADH2-1-F                      | 5'-CCCAGCTCCAAATTGCACGACCAGAGTG-3'                      |
| PpADH2-1-R                      | 5'-TTTGAAGCTATGGTGTGTGGGCAATAGGCAGGGTGAAAGGA-3'         |
| PpADH2-2-F                      | 5'-CGAAGGCTTTAATTTGCAAGCTCTGTGATCAAACCGTTGTGG-3'        |
| PpADH2-2-R                      | 5'-CCGCTCGAGATGGTACCCAGGCAAAGAGA-3'                     |
| PpAHD2-Zeo-F                    | 5'-TCCTTTCACCTGCCTATTGCCACACACCATAGCTTCAAA -3'          |
| PpADH2-Zeo-R                    | 5'-CCACAACGGTTTGATCACAGAGCTTGCAAATTAAGCCTTCG -3'        |
| PpALD4-1-F                      | 5'-CGGGATCCTGTCTGATCCAGACCAGCAG-3'                      |
| PpALD4-1-R                      | 5'-TTTGAAGCTATGGTGTGTGGGTTGGGCAAGGAAAAATCAAG-3'         |
| PpALD4-2-F                      | 5'-CGAAGGCTTTAATTTGCAAGCTTGGGTCAACACCTACAACGA-3'        |
| PpALD4-2-R                      | 5'-GACTAGTTCCTCGCTCCGACAAAAGTT-3'                       |
| PpALD4-Zeo-F                    | 5'-CTTGATTTTTCCTTGCCCAACCCACACACCATAGCTTCAAA -3'        |
| PpALD4-Zeo-R                    | 5'-TCGTTGTAGGTGTTGACCCAAGCTTGCAAATTAAGCCTTCG -3'        |
| PpACS1-1-F                      | 5'-AACTGCAGGCTCAGCGGTTATGTTGGTT-3'                      |
| PpACS1-1-R                      | 5'-TTTGAAGCTATGGTGTGTGGGACGAGCGTCAGTGAAAGGAG-3'         |
| PpACS1-2-F                      | 5'-CGAAGGCTTTAATTTGCAAGCTTGTGCAAAAAGAGATTGGACCAT-3'     |
| PpACS1-2-R                      | 5'-GACTAGTCAAAAACCTTTTGATCATACTGTGG-3'                  |
| PpACS1-Zeo-F                    | 5'-CTCCTTTCACCTGACGCTCGTCCCACACACCATAGCTTCAAA -3'       |
| PpACS1-Zeo-R                    | 5'-ATGGTCCAATCTCTTTTCTGACAAGCTTGCAAATTAAGCCTTCG -3'     |
| PpACS2-1-F                      | 5'-TGGTTGGCATTATTCACCTGTC-3'                            |
| PpACS2-1-R                      | 5'-GAAGCTATGGTGTGTGGGCTATGACCAGTGCCTCGAAAAT-3'          |
| PpACS2-2-F                      | 5'-CGAAGGCTTTAATTTGCAAGCTCCGTCAGCGCCTATCTAATC-3'        |
| PpACS2-2-R                      | 5'-TTAATCGTACGGTGAACCA-3'                               |
| PpACS2-Bsd-F                    | 5'-ATTTTCGAGGCACTGGTCCATAGCCCACACACCATAGCTTC -3'        |
| PpACS2-Bsd-R                    | 5'-GATTAGATAGGCGCTGACGGAGCTTGCAAATTAAGCCTTCG-3'         |
| PpMXR1-1-F                      | 5'-TCAAAAAGCCAAAGGACCAG-3'                              |
| PpMXR1-1-R                      | 5'-GAAGCTATGGTGTGTGGGCTTGCGTGGGATAAAGTCATCA-3'          |
| PpMXR1-2-F                      | 5'-CGAAGGCTTTAATTTGCAAGCTTTCTGGATTCTTCTTCCTTTGT -3'     |
| PpMXR1-2-R                      | 5'-AGTTTCCTCCAGCGGAGTT-3'                               |
| PpMXR1-Bsd-F                    | 5'-TGATGACTTTATCCCACGCAAGCCCACACACCATAGCTTC-3'          |
| PpMXR1-Bsd-R                    | 5'-ACAAAGGAAGAAGAATCCAGAAAGCTTGCAAATTAAGCCTTCG-3'       |
| KpnI-PpACS1-F                   | 5'-GGGGTACCCAGCAAATCATCTGGCTCA-3'                       |
| SphI-PpACS1-R                   | 5'-ACATGCATGCTTTGCGGGCATCCCTTTTAA-3'                    |
| XhoI-PpACS1-F                   | 5'-CTCGAGCAGCAAAATCATCTGGCTCA-3'                        |
| P <sub>PpACS1</sub> -(PpACS2)-R | 5'-CTCTTGGCTCTGGAAAAGTCAATAATTGATCAACAATAAGTCGTATCCT-3' |
| P <sub>PpACS1</sub> -(ScACS1)-R | 5'-GTACGGCAGGGGCGACATAATTGATCAACAATAAGTCGTATCCT-3'      |
| (P <sub>PpACS1</sub> )-PpACS2-F | 5'-AGGATACGACTTAGTTGTTGATCAATTATGACTTTTCCAGAGCCAAGAG-3' |
| SphI-PpACS2-R                   | 5'-GCATGCCTTCTGAAGAAGTGGTTATCAACAG-3'                   |
| (P <sub>PpACS1</sub> )-ScACS1-F | 5'-AGGATACGACTTAGTTGTTGATCAATTATGTCGCCCTCTGCCGTAC-3'    |
| SphI-ScACS1-R                   | 5'-GCATGCCAAGTGGACCGAATCAATTAGATG-3'                    |
| PpACS1-3-6d-F                   | 5'-TATGCCACACTTACTTCATGAAAAT-3'                         |
| PpACS1-3-6d-R                   | 5'-AGTAAGTGTGGCATAATTGATCAACA-3'                        |
| KpnI-PpMXR1-F                   | 5'-GGGGTACCGGTGTCATCAAGTGGCGTACTG -3'                   |
| BamHI-PpMXR1-R                  | 5'-CGGGATCCGACACCACCATCTAGTCGGTTT-3'                    |
| PpMXR1-S215A-F                  | 5'-AGAGCTGCTTTCTCCGCCGTTAGTGGGA-3'                      |
| PpMXR1-S215A-R                  | 5'-GGAGAAAGCAGCTCTTCTTAGTCCAAG-3'                       |
| KpnI-PpACS1(ORF)-F              | 5'-GGGGTACCATGCCCATTAGATAACGAACACTTACTT-3'              |
| NotI-PpACS1-R                   | 5'-GCGGCCGCGTTTGCGGGCATCCCTTTTAA-3'                     |
| KpnI-PpATG1-1-F                 | 5'-GGGGTACCCAATTGCACCGTTAACATCG-3'                      |
| PpATG1-1-R                      | 5'-GAAGCTATGGTGTGTGGGCTTGCTCACAATCCAATAGAGCAA -3'       |
| PpATG1-2-F                      | 5'-CGAAGGCTTTAATTTGCAAGCTGGCTATCTGGATGCTGGAAG -3'       |
| HindIII-PpATG1-2-R              | 5'-CCCAAGCTTTAGGAAGGGGTTCCCTTGGTT-3'                    |
| PpATG1-Bsd-F                    | 5'-TTGCTCTATTGGATTGTGAGCAAGCCCACACACCATAGCTTC-3'        |
| PpATG1-Bsd-R                    | 5'-CTTCCAGCATCCAGATAGCCAGCTTGCAAATTAAGCCTTCG -3'        |
| FW-SEQ                          | 5'-GTGGAACGAAAACACGTTAAGGGAT-3'                         |
| RV-SEQ                          | 5'-GAGTAAAAAAGGAGTACAAACATTTTGAAGCTATGGTG-3'            |
| RT-AOX1-F                       | 5'-AGGGCTTCTGAGTCCCAAGG-3'                              |
| RT-AOX1-R                       | 5'-AGCAGAGTCGGAACGACGAC-3'                              |
| RT-DAS1-F                       | 5'-TTGCGTATGGCTGCTCTTCA-3'                              |
| RT-DAS1-R                       | 5'-GGGTTGGACCATCTTCACCA-3'                              |
| RT-FLD1-F                       | 5'-CACGCTTCTGGTGCAGATG-3'                               |
| RT-FLD1-R                       | 5'-ATCCCAACCTTACGGACT-3'                                |
| RT-FDH1-F                       | 5'-GCACATTCCTGACGCTGATG-3'                              |
| RT-FDH1-R                       | 5'-GACACCAGCAACGACCAACA-3'                              |
| RT-ACS1-F                       | 5'-CTGACGCTCGTTACCCACT-3'                               |
| RT-ACS1-R                       | 5'-CGCGTTCAACTCACCATTCA-3'                              |
| RT-GAP1-F                       | 5'-CCACCGGTGTTTTCCACACT-3'                              |
| RT-GAP1-R                       | 5'-CACCGACAACGAACATTGGA-3'                              |

## Legends to Supplementary Figures

**Fig. S1.** Growth of the wild-type, *Kpadh2Δ*, *Kpald4Δ*, *Kpacs1Δ*, and *Kpacs2Δ* strains on glucose, ethanol, methanol, and EM media. Serial dilutions of cell suspension of each strain were dropped onto YNB agar plates containing indicated carbon sources. Cell growth was scored after 3-days incubation at 28°C.

**Fig. S2.** Ethanol metabolism is involved in the repression of expression of methanol-induced genes. (a) Fluorescence microscopy of the wild-type, *Kpadh2Δ*, and *Kpald4Δ* cells expressing GFP-SKL under the control of the *KpAOX1* promoter in EM medium, ethanol medium, and methanol medium, (b) Transcript levels of methanol-inducible genes in the wild-type, *Kpadh2Δ*, and *Kpald4Δ* strains. Total mRNA was prepared from the wild-type (open bars), *Kpadh2Δ* (closed bars), and *Kpald4Δ* (gray bars) cells incubated in EM medium or methanol medium for 2 h. The mRNA levels were monitored by qRT-PCR analysis using the *GAPI* gene as the standard. Transcript levels are expressed as values relative to those of the wild-type strain, and the means and S.D. from three independent experiments are shown. (c) Fluorescence microscopy of the wild-type, *Kpadh2Δ*, and *Kpald4Δ* cells expressing GFP-SKL under the control of the *KpAOX1* promoter in methanol medium with 0.05% acetaldehyde or 3 mM sodium acetate (acetate). (d) Transcript levels of *KpFLD1* and *KpFDH1* in the wild-type, *Kpacs1Δ*, and *Kpacs2Δ* strains. Total mRNA was prepared from the wild-type (open bars), *Kpacs1Δ* (closed bars), and *Kpacs2Δ* (gray bars) cells pre-cultured in glucose medium (Glu) or ethanol medium (Et) and cultured in EM medium for 2 h. The mRNA levels were monitored by qRT-PCR analysis using the *GAPI* gene as the standard. Transcript levels are expressed as values relative to those of the wild-type strain, and the means and S.D. from three independent experiments are shown. (e) Transcript levels of methanol-inducible genes in the wild-type, *Kpacs1Δ*, and *Kpacs2Δ* strains. Total mRNA was prepared from the wild-type (open bars), *Kpacs1Δ* (closed bars), and *Kpacs2Δ* (gray bars) cells pre-cultured in glucose medium (Glu) or ethanol medium (Et) and cultured in the medium containing glucose and methanol for 2 h. The mRNA levels were monitored by

qRT-PCR analysis using the *GAPI* gene as the standard. Transcript levels are expressed as values relative to those of the wild-type strain, and the means and S.D. from three independent experiments are shown. (f) Transcript levels of *KpFLDI* and *KpFDHI* in the wild-type and *Kpacs1Δ* strains precultured in ethanol medium and cultured in methanol medium with or without 0.5% ethanol, 0.05% acetaldehyde, or 3 mM sodium acetate (acetate) for 2 h. Total mRNA was prepared from the wild-type (open bars) and *Kpacs1Δ* (closed bars) cells. The mRNA levels were monitored by qRT-PCR analysis using the *GAPI* gene as the standard. Transcript levels are expressed as values relative to those of the wild-type strain, and the means and S.D. from three independent experiments are shown.

**Fig. S3.** Expression of the Acs-CFP-encoding genes under the control of the *KpACSI* promoter in EM medium. (a) Fluorescence microscopy of the *Kpacs1Δ* strain expressing *KpACSI-CFP*, *KpACS2-CFP*, or *ScACSI-CFP*. Cells were transferred from ethanol medium to EM medium for 2 h. (b) Production of KpAcs1-CFP, KpAcs2-CFP, and ScAcs1-CFP proteins in *K. phaffii*. Cultures that reached an OD<sub>610</sub> of 2.0 were lysed and analyzed by immunoblot analysis as described in Materials and Methods. (c) Fluorescence microscopy of the *Kpacs1Δ* strain producing KpAcs1-CFP or KpAcs1(Δ3-6)-CFP. Cells were transferred from ethanol medium to EM medium for 2 h. (d) Production of KpAcs1-CFP and KpAcs1(Δ3-6)-CFP proteins. Cultures that reached an OD<sub>610</sub> of 2.0 were lysed and analyzed by immunoblot analysis as described in Materials and Methods.

**Fig. S4.** Downregulation of KpAcs1 by autophagy supports the expression of methanol-inducible genes. (a) Immunoblot detection of KpAcs1-CFP and AOX in wild-type and *Kpatg1Δ* cells at the indicated time points after transfer from ethanol to methanol medium. The band positions corresponding to KpAcs1-CFP and its processed form (CFP) are indicated. (b) Overexpression of *KpACSI* lowered the expression of methanol-inducible genes. Transcript levels of *AOX* in the wild-type strain, the wild-type strain expressing *KpACSI-Myc-6xHis* under the control of the *KpGAPI* promoter (+*KpACSI*), and the *Kpatg1Δ* strain expressing *KpACSI-Myc-6xHis* under the control of the *KpACSI* promoter

(*atg1Δ*). Total mRNA was prepared from these strains after pre-culturing in ethanol medium and culturing in methanol medium for 2 h. The mRNA levels were monitored by qRT-PCR analysis using the *GAPI* gene as the standard. Transcript levels are expressed as the values (%) relative to those of the wild-type strain, and the means and S.D. from three independent experiments are shown.

**Fig. S5.** The original image data of Western blot analysis in the left panel of Fig. 2a. The same samples were loaded on different gels. For detection of actin, a portion of the gel was cut off. Detection of secondary antibodies was done at the same time.

**Fig. S6.** The original image data of Western blot analysis in the right panel of Fig. 2a. After electrophoresis, the gel was cut off into two. The upper part of the gel was used for detection of CFP and the lower part of the gel was used for detection of actin. Detection of secondary antibodies was done at the same time. For the detection of actin (lower panel), exposure time was longer than that for the detection of CFP (upper panel).

**Fig. S7.** The original image data of Western blot analysis in Fig. 4b. The same samples were loaded on different gels. For detection of actin (lower panel), a portion of the gel was cut off.

**Fig. S8.** The original image data of Western blot analysis in Fig. 4c. The same samples were loaded on different gels. For detection of actin (lower panel), a portion of the gel was cut off.

**Fig. S9.** The original image data of Western blot analysis in Fig. 4d and Fig. S3b. The same samples were loaded on different gels. For detection of actin, a portion of the gel was cut off. Detection of secondary antibodies was done at the same time. For the detection of actin (lower panel), exposure time was longer than that for the detection of CFP (upper panel).

**Fig. S10.** The original image data of Western blot analysis in Fig. 4e. The same samples were loaded on different gels. For detection of actin (lower panel), a portion of the gel was cut off.



**Fig. S11.** The original image data of Western blot analysis in Fig. 6.

**Fig. S12.** The original image data of Western blot analysis in Fig. S3d. The same samples were loaded on different gels. For detection of actin, a portion of the gel was cut off. Detection of secondary antibodies was done at the same time. For the detection of actin (lower panel), exposure time was longer than that for the detection of CFP (upper panel).

**Fig. S13.** The original image data of Western blot analysis in Fig. S4a. The same samples were loaded on different gels. For detection of AOX (upper panel) and actin (lower panel), a portion of the gel was cut off. For detection of CFP and AOX (upper panel), detection of secondary antibodies was done at the same time.

# Supplementary Fig. S1

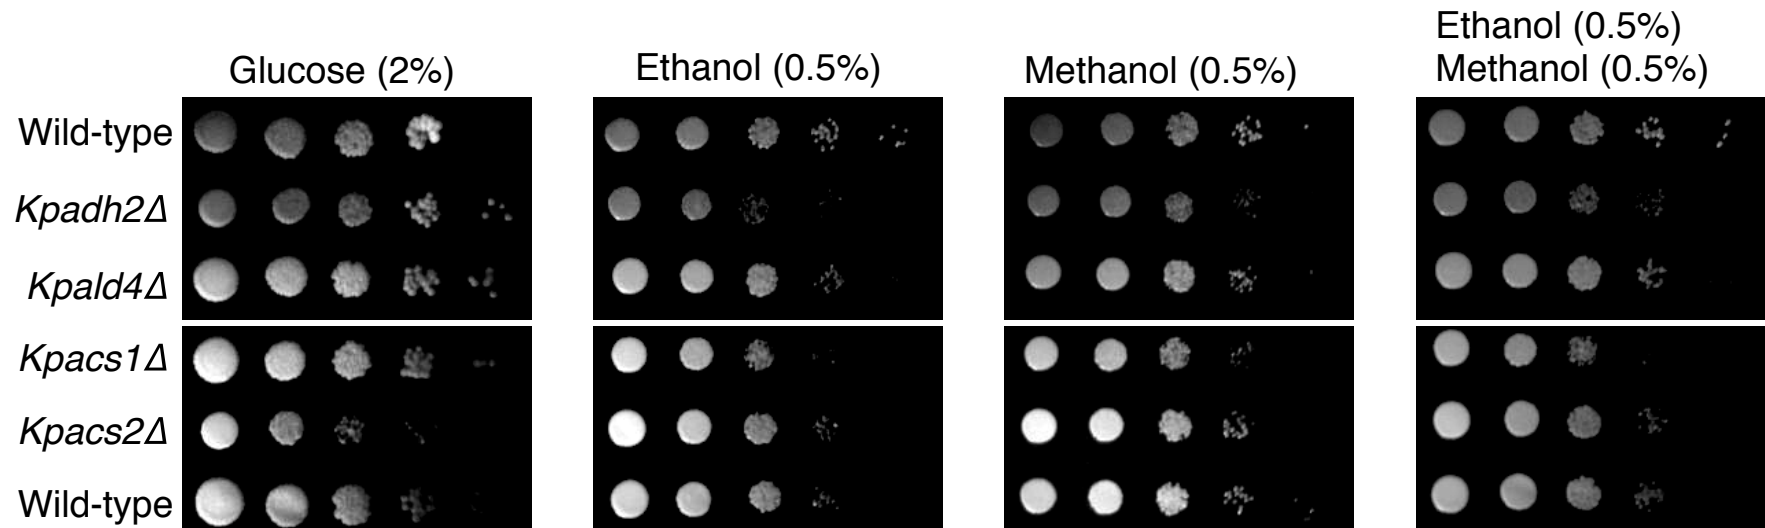

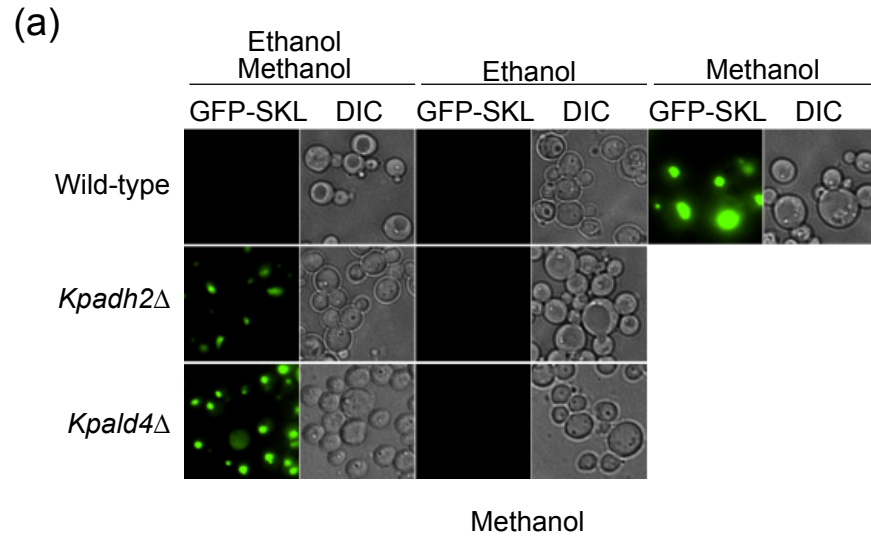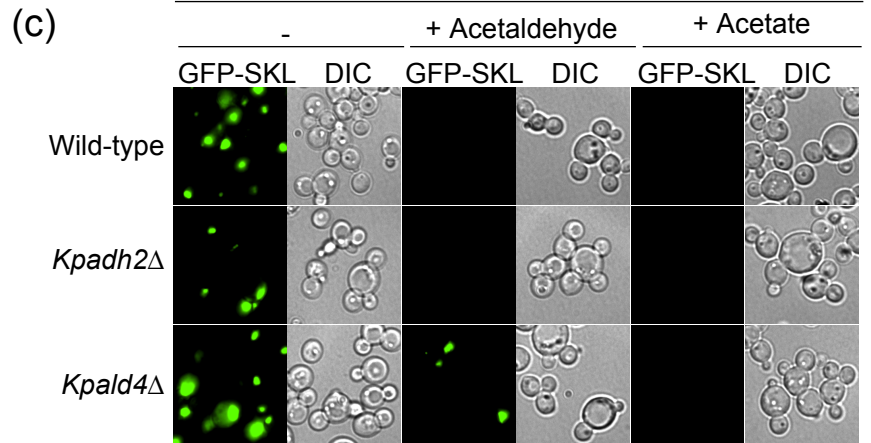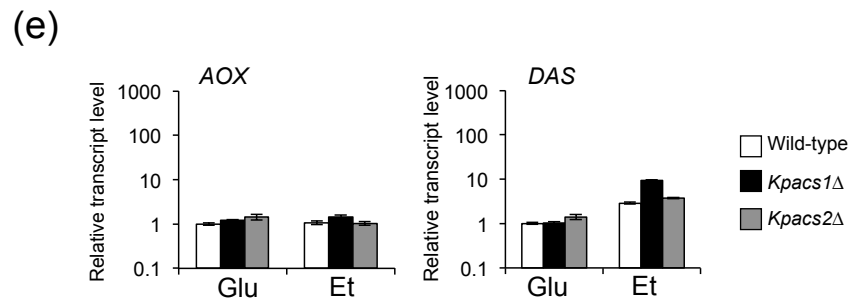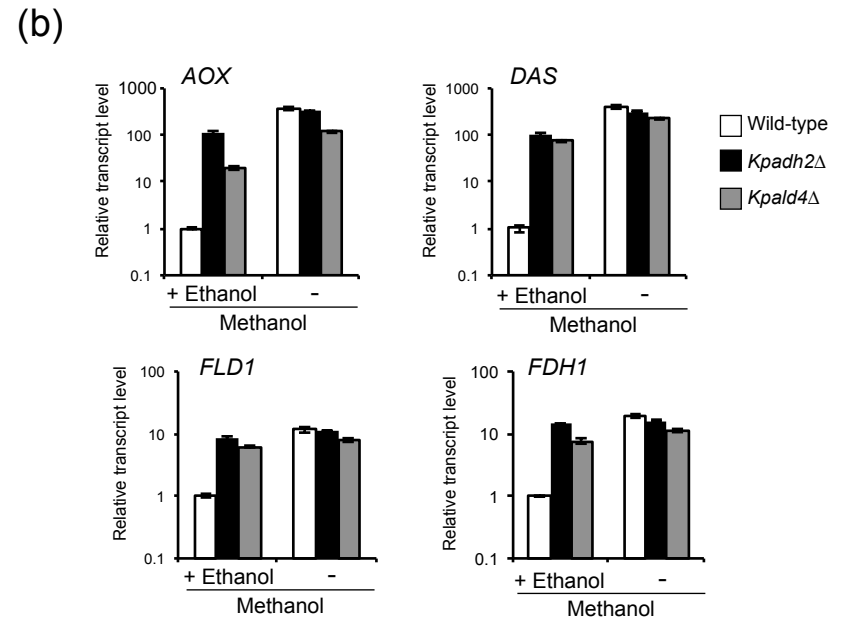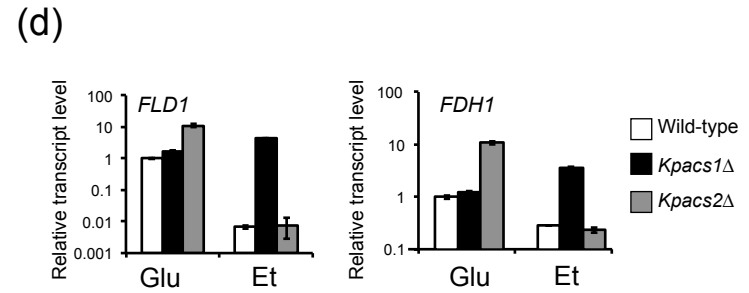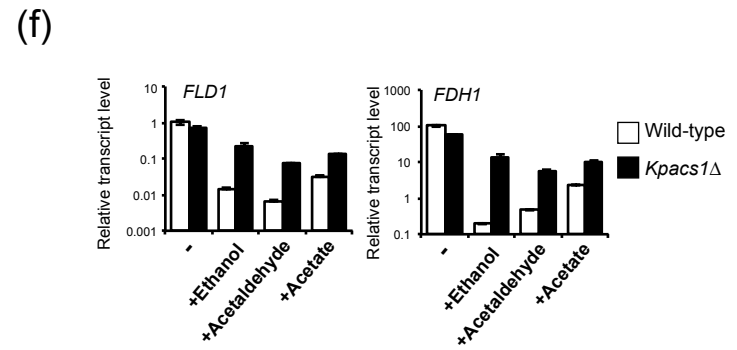

(a)

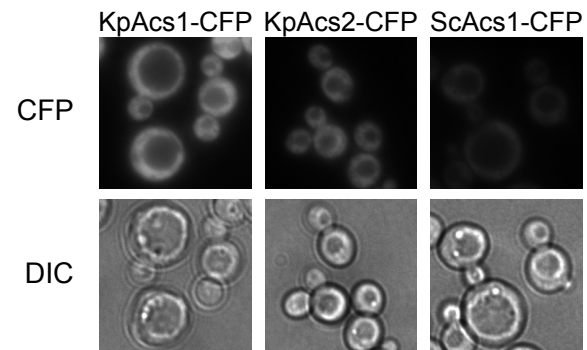

(b)

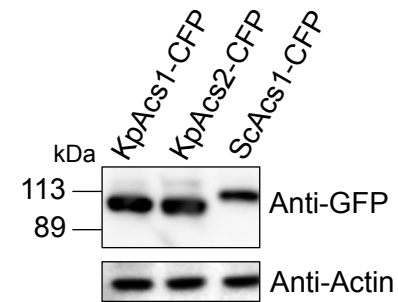

(c)

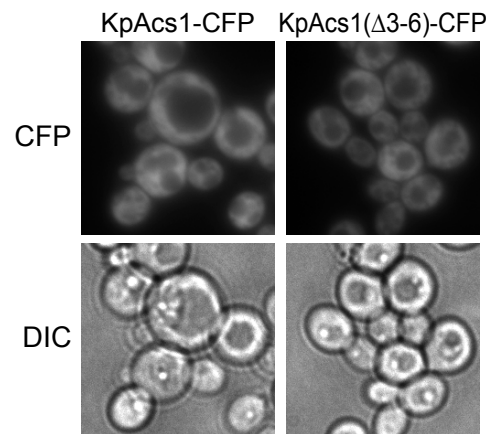

(d)

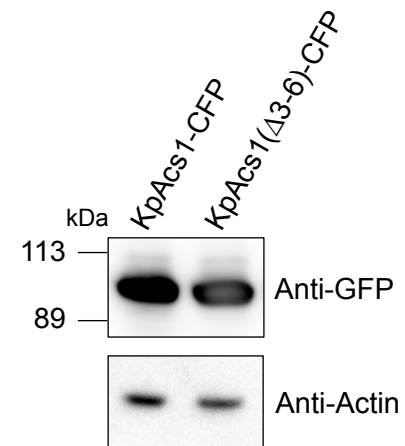

(a)

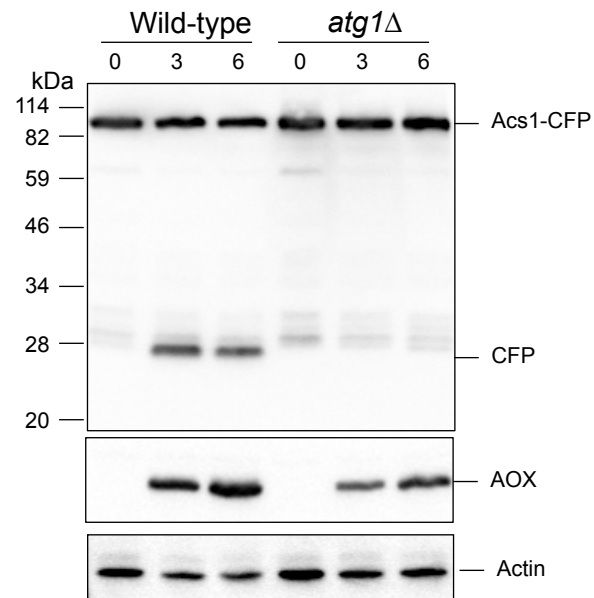

(b)

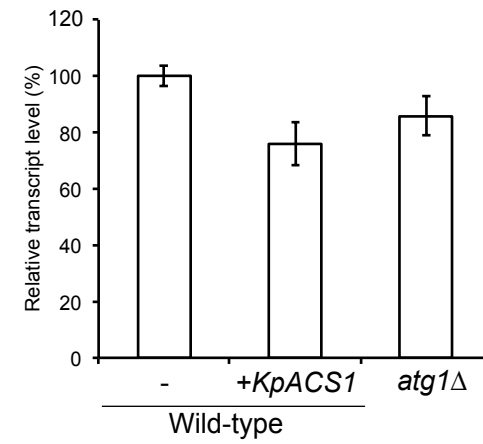

Supplementary Fig. S5

Fig. 2a, left; anti-GFP& anti-Actin

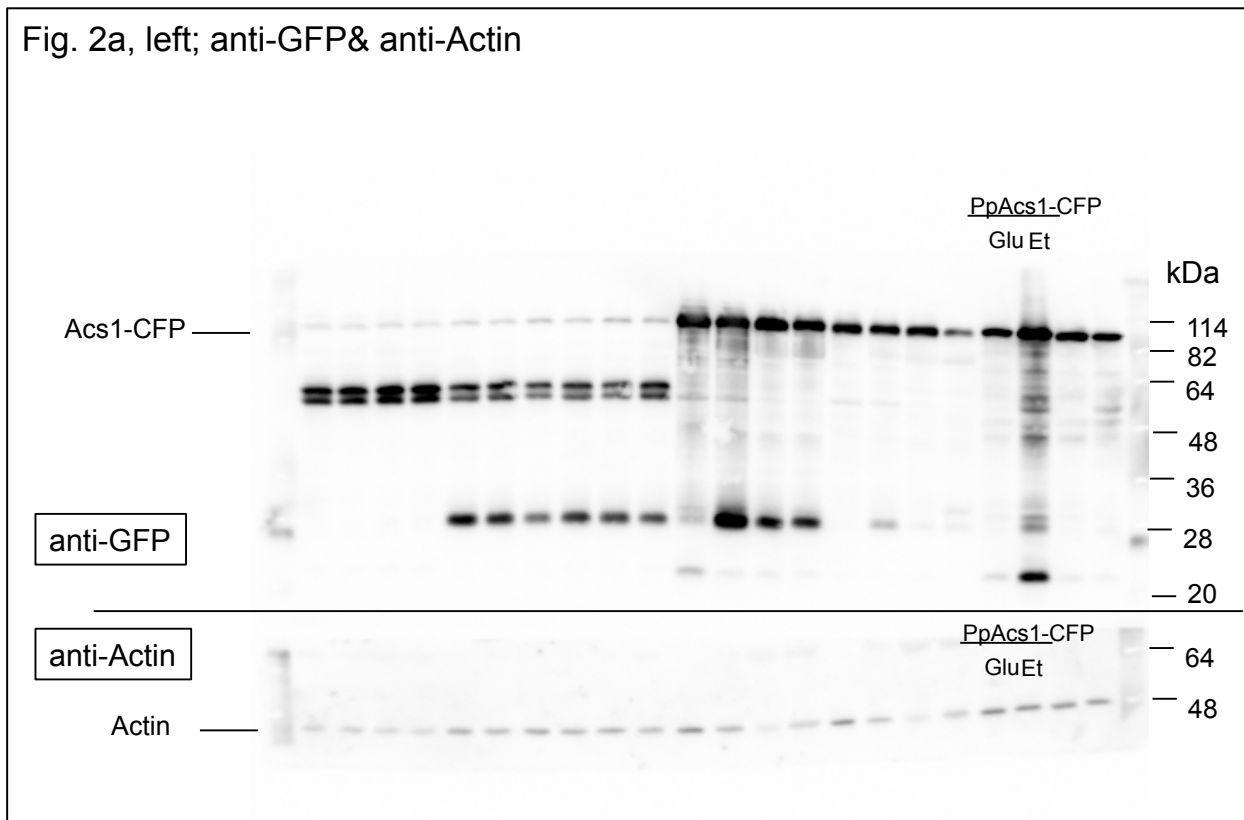

# Supplementary Fig. S6

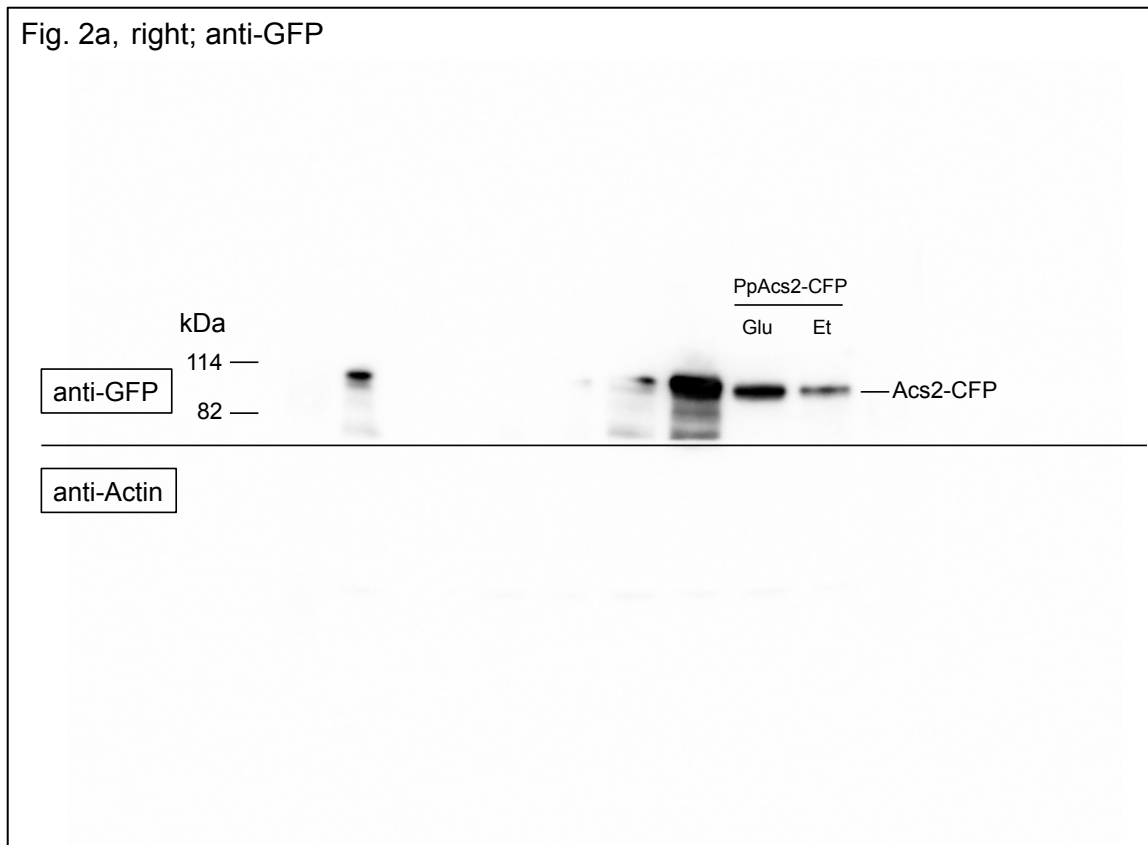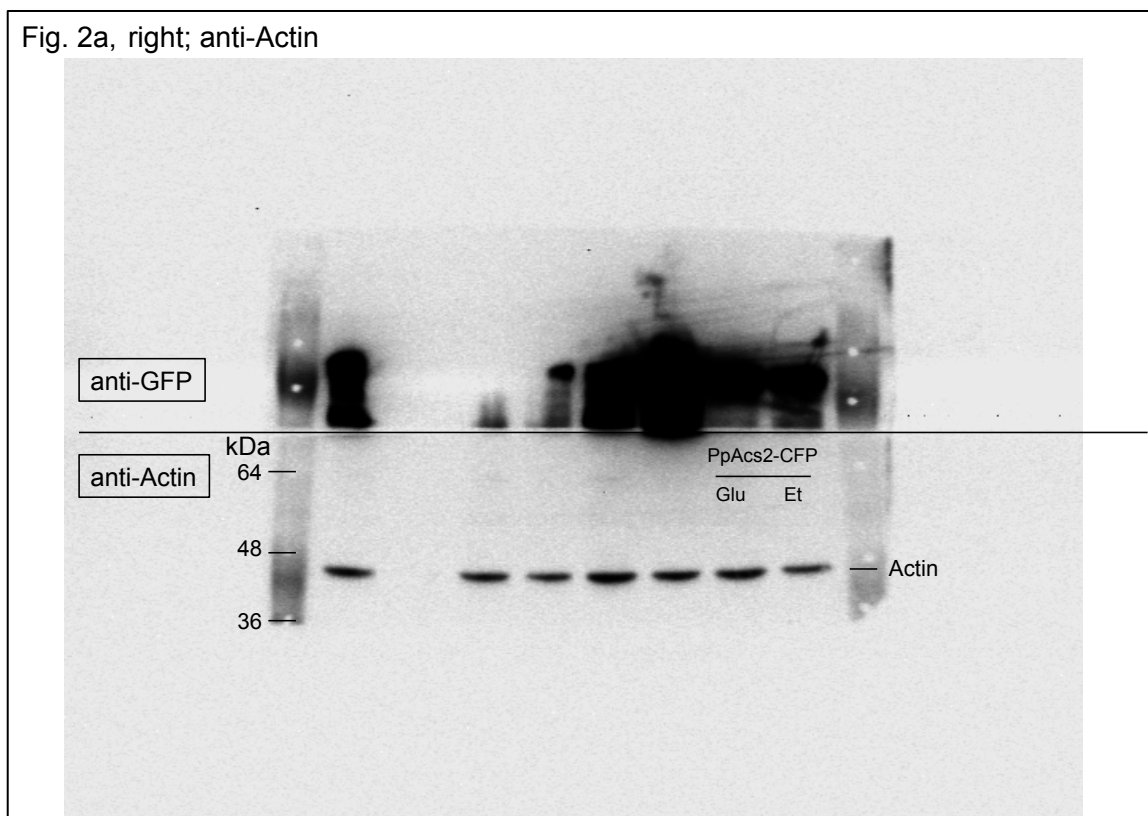

# Supplementary Fig. S7

Fig. 4b; anti-GFP

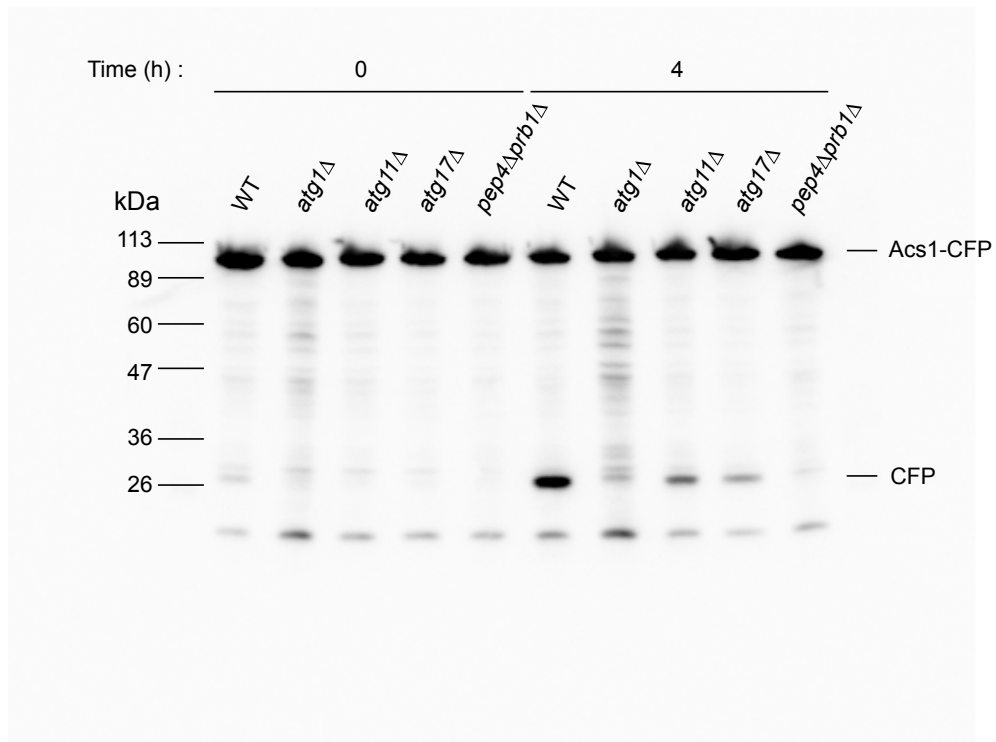

Fig. 4b; anti-Actin

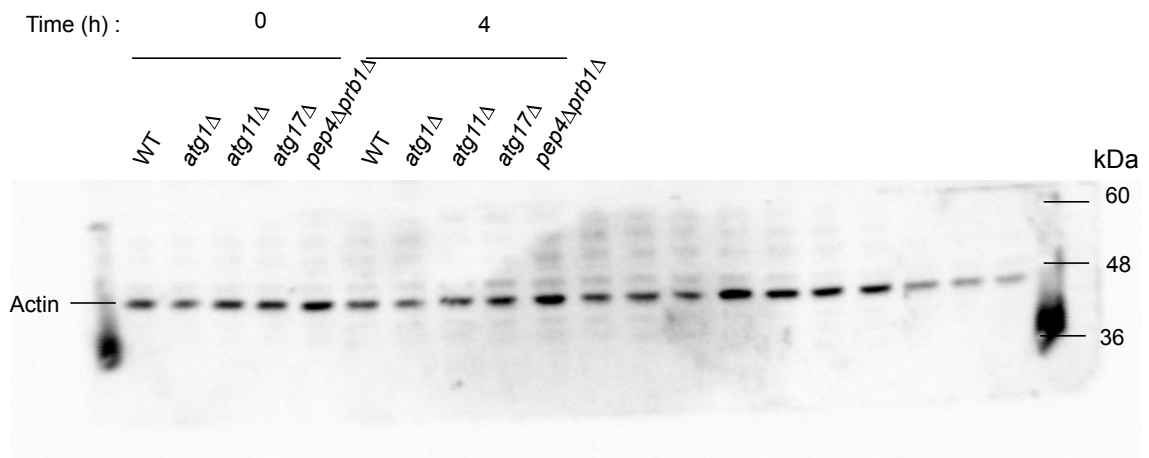



# Supplementary Fig. S8

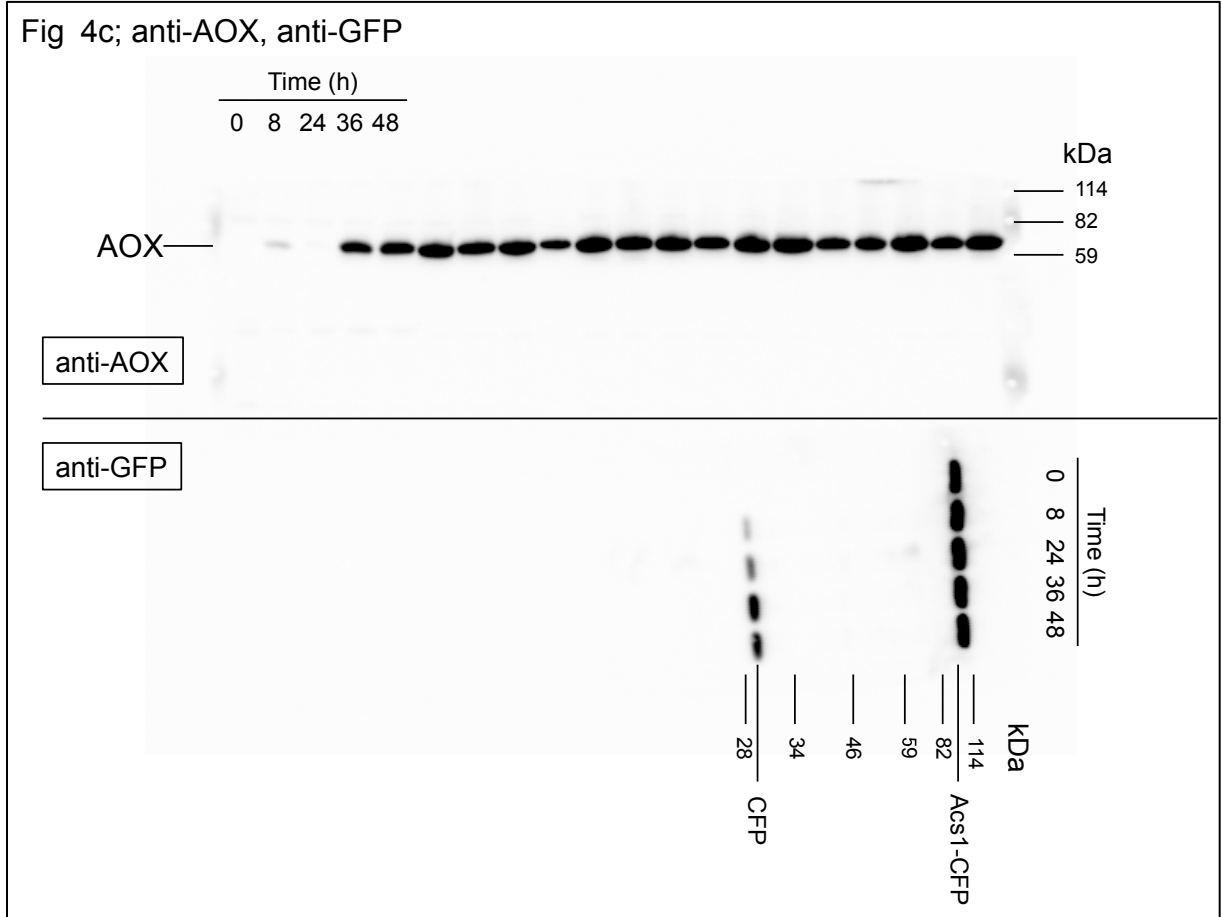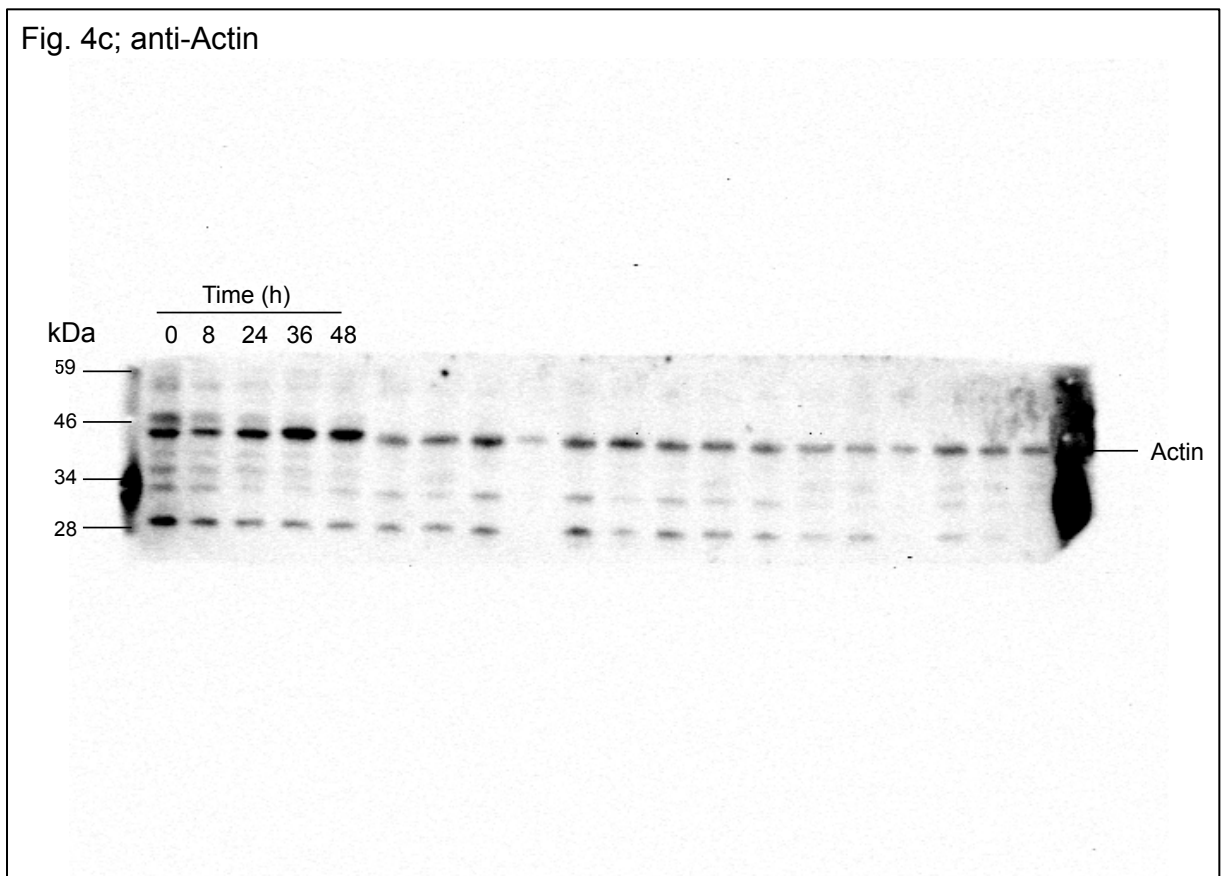

Supplementary Fig. S9

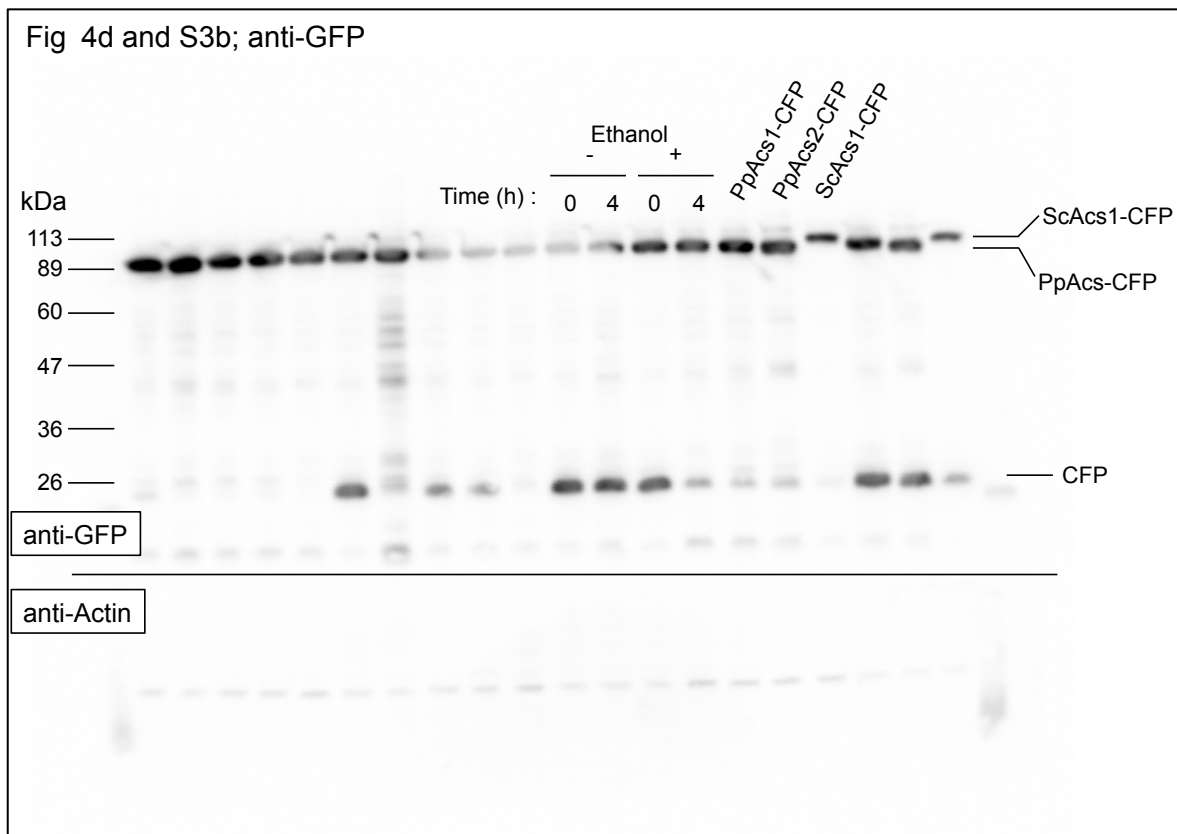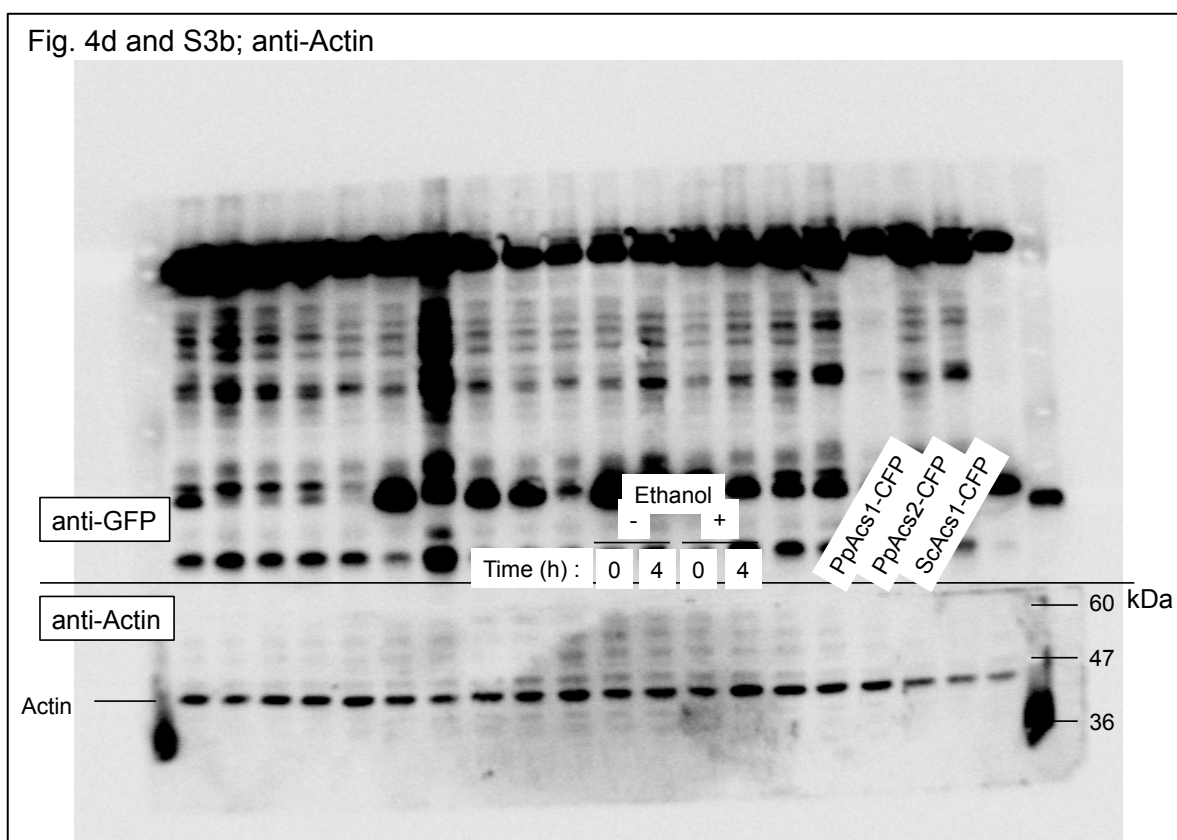

Supplementary Fig. S10

Fig. 4e; anti-GFP

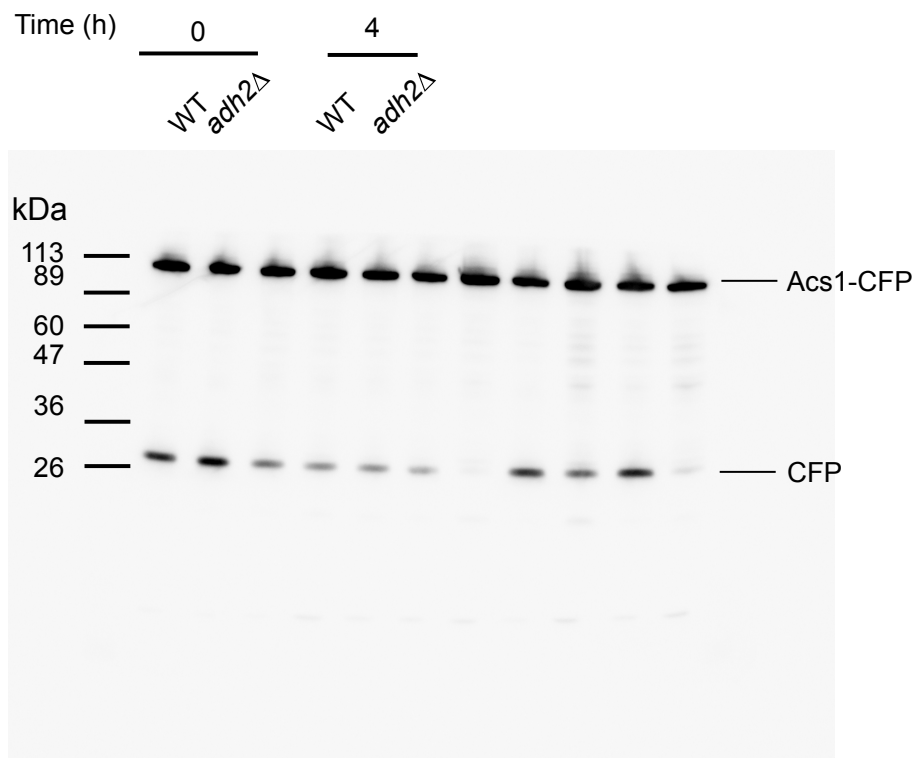

Fig. 4e; anti-Actin

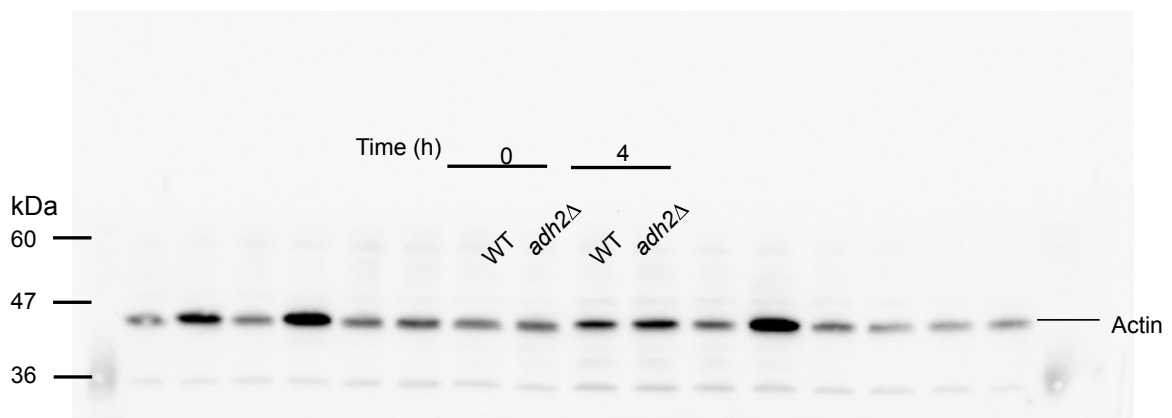

Supplementary Fig. S11

Fig. 6

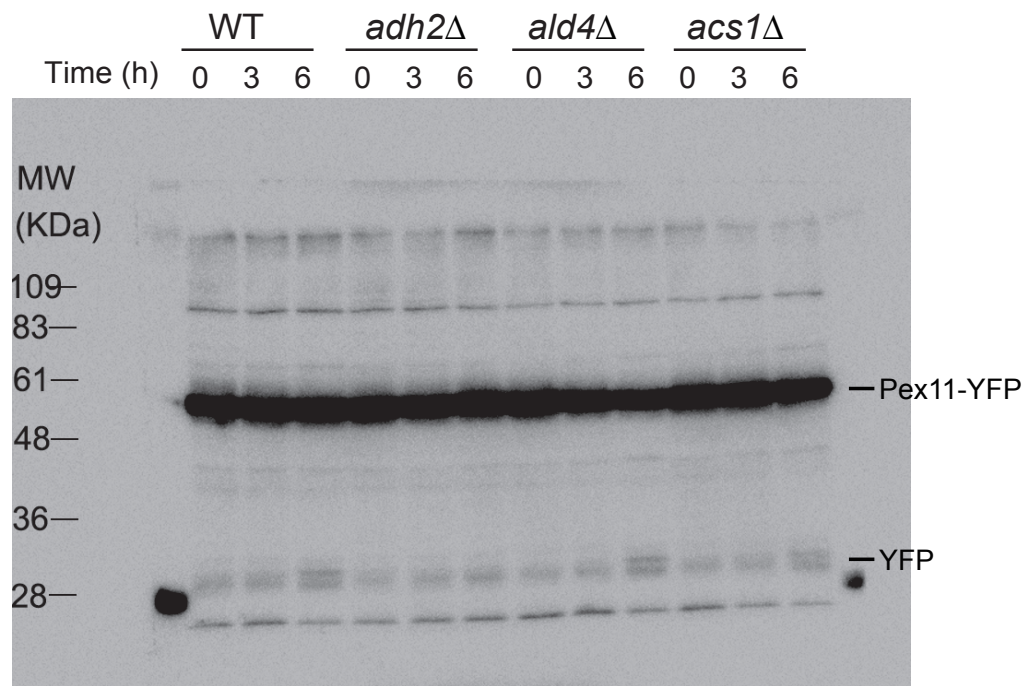

Supplementary Fig. S12

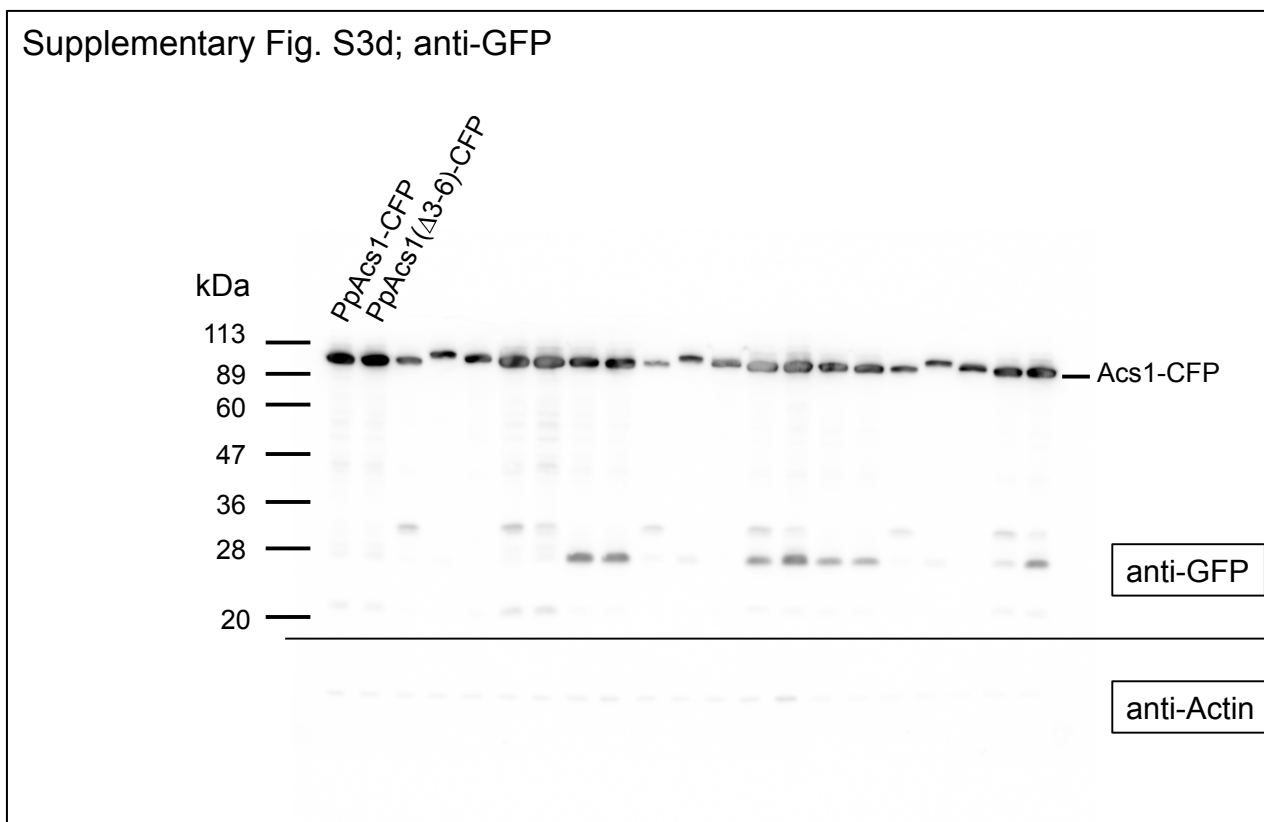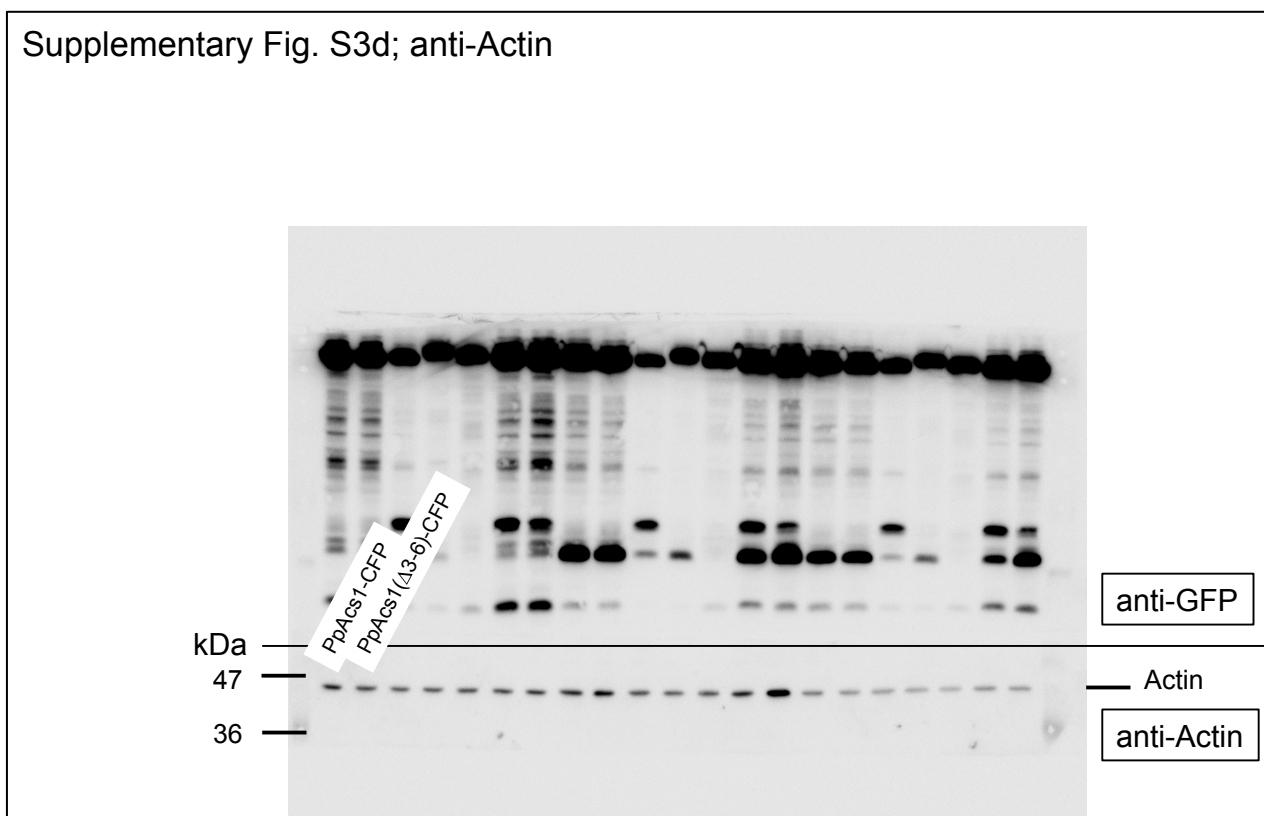

# Supplementary Fig. S13

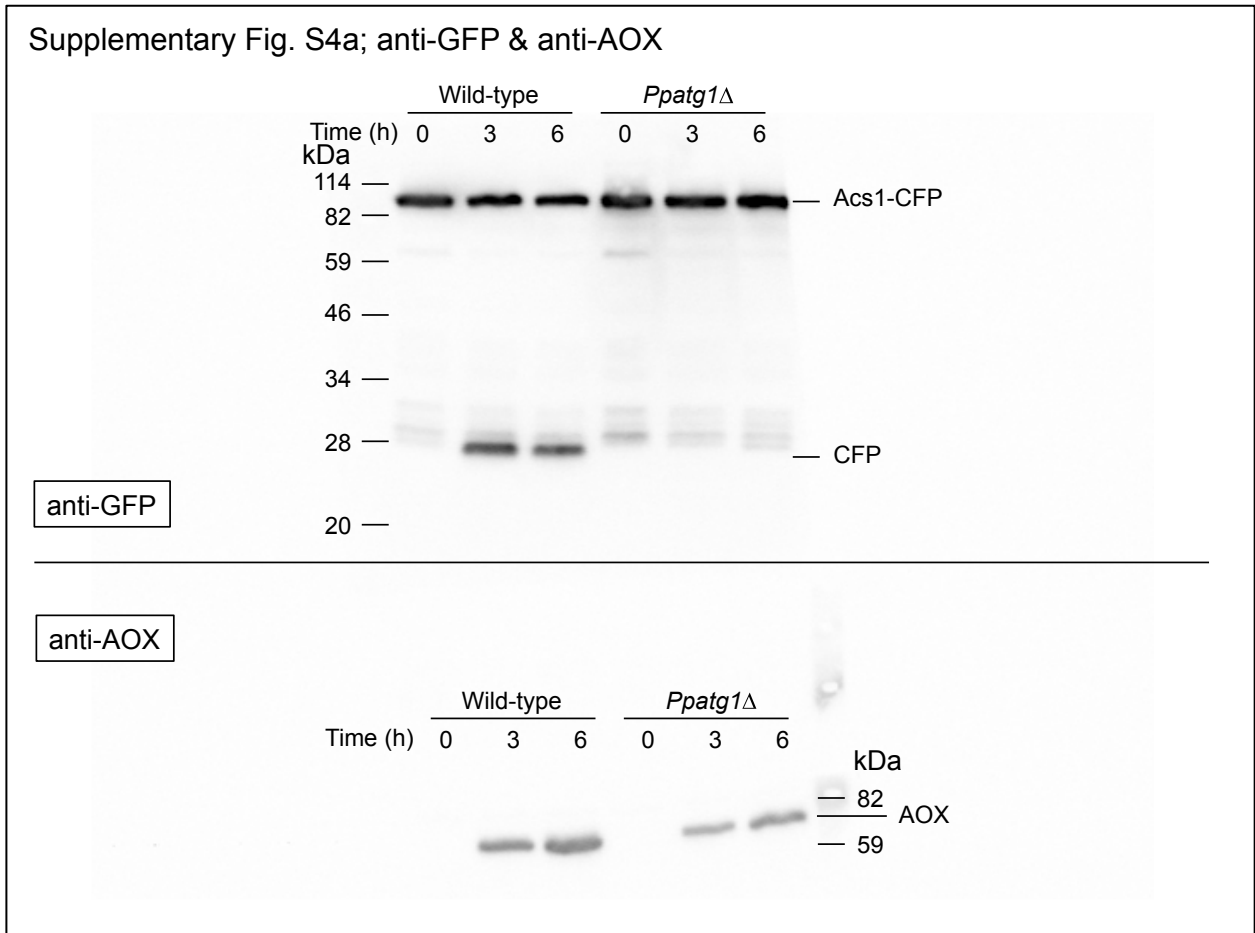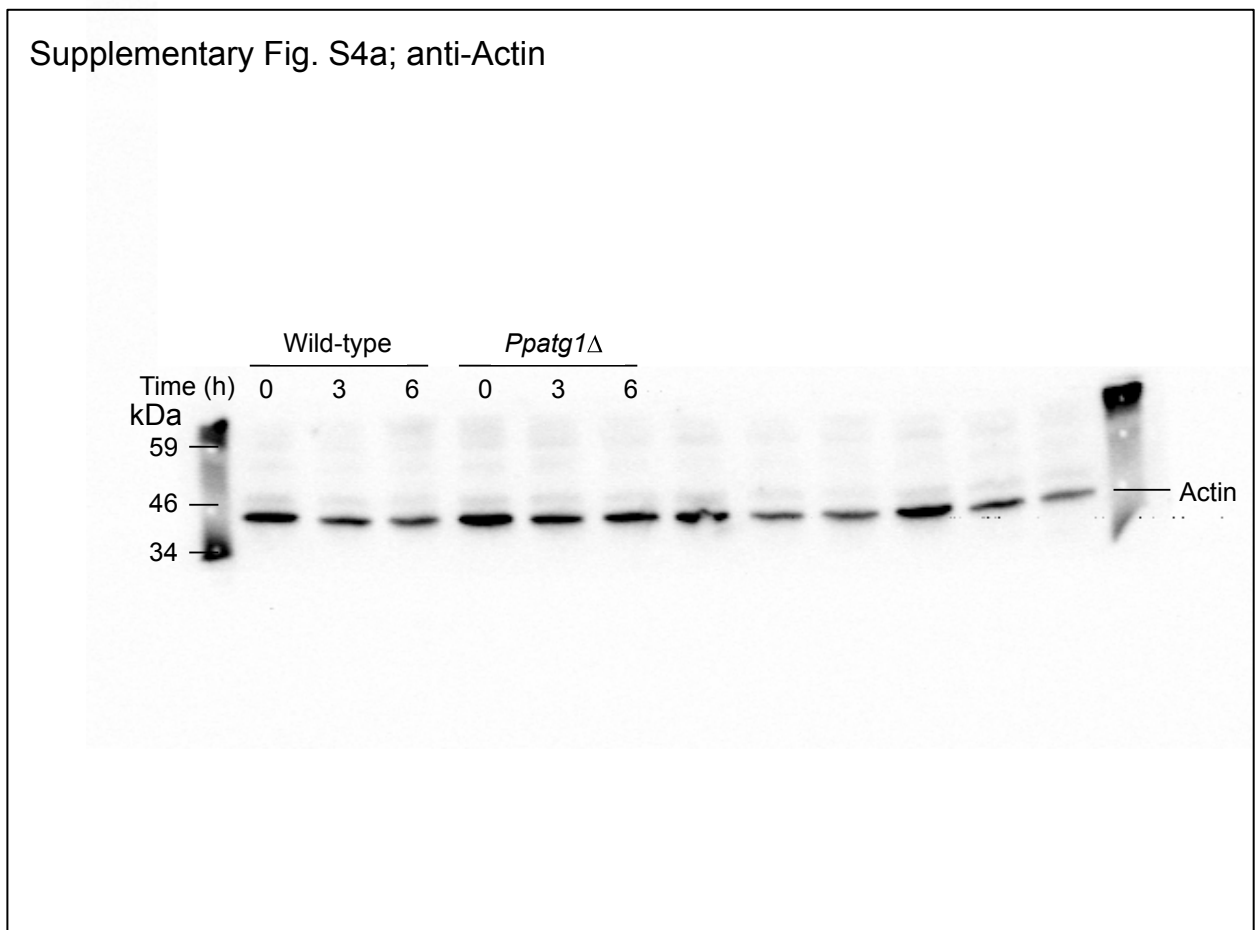

Supplement: 41598_2018_36732_MOESM1_ESM.pdf [file 41598_2018_36732_MOESM1_ESM.pdf]
